# Supplementary material for: Graphene oxide based nickel–copper–zinc and copper–zinc cobaltite: catalysts for the thermolysis of ammonium perchlorate and nitrotriazolone
Source: Royal Society of Chemistry journal article supplement (doi:10.1039/d3ya00045a), 2023-01-01
Supplement: d3ya00045a1.pdf [file d3ya00045a1.pdf]

# Graphene oxide based nickel copper zinc and copper zinc cobaltite: Catalysts for thermolysis of ammonium perchlorate and nitrotriazolone

Pragnesh N Dave<sup>\*,a</sup> and Ruksana Sirach<sup>a</sup>

<sup>a</sup>Department of Chemistry, Sardar Patel University, Vallabh Vidyanagar, 388 120, Gujarat, India

\*Corresponding author:pragnesh7@yahoo.com

## Supplementary file

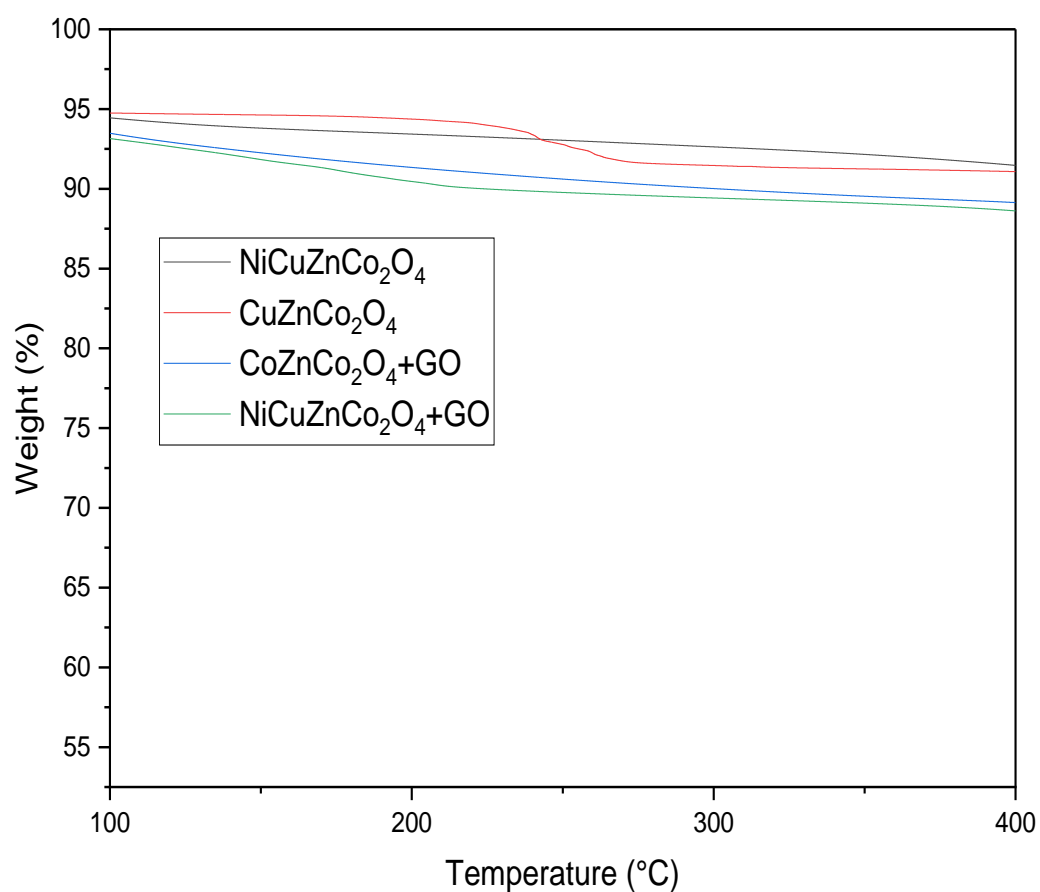

Fig. S 1. TG thermogram of NiCuZnCo<sub>2</sub>O<sub>4</sub>, CuZnCo<sub>2</sub>O<sub>4</sub>, NiCuZnCo<sub>2</sub>O<sub>4</sub>+GO, and CuZnCo<sub>2</sub>O<sub>4</sub>+GO.
